# Supplementary material for: Whole-Body MRI Surveillance—Baseline Findings in the Swedish Multicentre Hereditary TP53-Related Cancer Syndrome Study (SWEP53)
Source: MDPI journal article supplement (doi:10.3390/cancers14020380), 2022-01-13
Supplement: s1 [file s1]

# Supplementary material: Whole-body MRI Surveillance – Base-line findings in a Swedish multicentre Hereditary *TP53*-related cancer syndrome study (SWEP53)

Meis Omran, Emma Tham, Yvonne Brandberg, Håkan Ahlström, Claudia Lundgren, Ylva Paulsson-Karlsson, Ekaterina Kuchinskaya, Gustav Silander, Anna Rosén, Fredrik Persson, Henrik Leonhardt, Marie Stenmark-Askmalin, Johanna Berg, Danielle van Westen, Svetlana Bajalica-Lagercrantz and Lennart Blomqvist.

## Supplement S1

Table S1. Imaging protocol, WB-MRI.

| Coverage                      | Pulse sequence                      | Imaging plane | Comment                                  |
|-------------------------------|-------------------------------------|---------------|------------------------------------------|
| Whole-body<br>from skull base | T2-weighted turbo spin-echo         | Transaxial    | Half fourier single shot turbo spin echo |
|                               | T1-weighted gradient echo           | Transaxial    | Dixon based                              |
|                               | Diffusion-weighted                  | Transaxial    | Echo-planar based                        |
|                               |                                     |               |                                          |
| Brain                         | T1-weighted gradient echo           | Transaxial    | Three-dimensional acquisition (3D)       |
|                               | Fluid attenuated inversion recovery | Sagittal      | 3D FLAIR                                 |
| Breast                        | Inversion recovery                  | Sagittal      | Turbo spin echo based                    |
|                               | T1-weighted gradient echo           | Transaxial    | 3D Refocused gradient echo               |
|                               | T2-weighted                         | Transaxial    | Dixon based                              |
|                               | Diffusion-weighted                  | DWI           | Echo-planar based                        |
|                               | T1-weighted gradient echo           | Transaxial    | 3D Refocused gradient echo               |
|                               |                                     |               | with intravenous Gadolinium chelate      |
